# Supplementary material for: Epigenetic and transcriptional regulation of CCL17 production by glucocorticoids in arthritis
Source: PubMed Central journal article supplement (PMC10583050; doi:10.1016/j.isci.2023.108079), 2023-09-27
Supplement: mmc1.pdf [file mmc1.pdf]

**Supplemental information**

**Epigenetic and transcriptional regulation of CCL17**

**production by glucocorticoids in arthritis**

**Tanya J. Lupancu, Kevin M.C. Lee, Mahtab Eivazitork, Cecil Hor, Andrew J. Fleetwood, Andrew D. Cook, Moshe Olshansky, Stephen J. Turner, Richard de Steiger, Keith Lim, John A. Hamilton, and Adrian A. Achuthan**

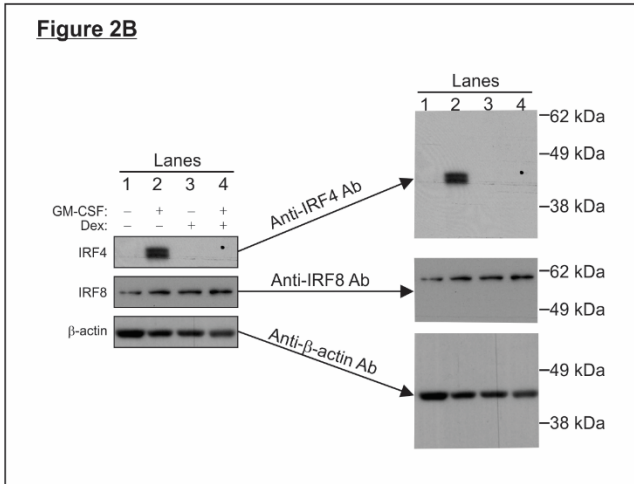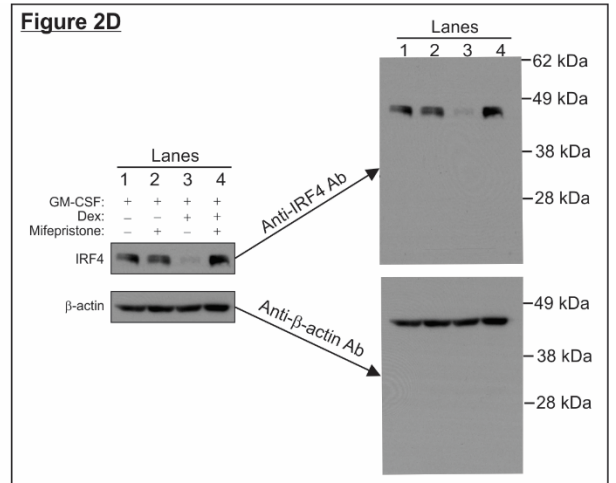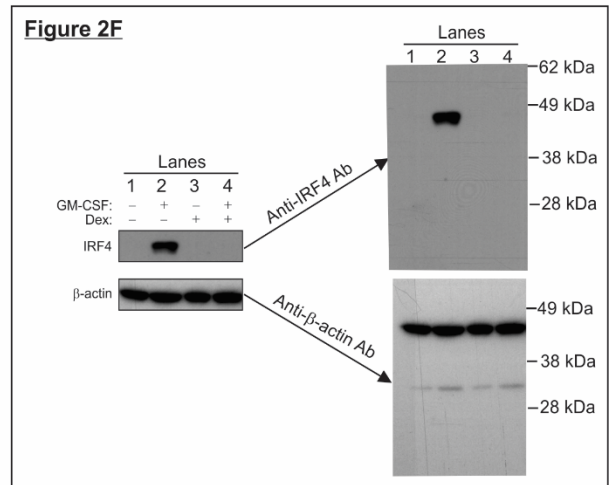

Figure S1: Original Western blot scans, related to Figure 2B, D and E.
